# Supplementary material for: A Novel Bispecific Antibody for EpCAM-Directed Inhibition of the CD73/Adenosine Immune Checkpoint in Ovarian Cancer
Source: MDPI journal article supplement (doi:10.3390/cancers15143651), 2023-07-17
Supplement: s1 [file s1]

## **SUPPLEMENTARY DOCUMENTATION**

### **A novel bispecific antibody for EpCAM-directed inhibition of the CD73/adenosine immune checkpoint in ovarian cancer**

Emily Maria Ploeg, Isabel Britsch, Anne Paulien van Wijngaarden, Xiurong Ke,  
Mark Alexander Johannes Martinus Hendriks, Douwe Freerk Samplonius and Wijnand Helfrich \*

Department of Surgery, Laboratory for Translational Surgical Oncology, University of  
Groningen, University Medical Center Groningen, 9713 GZ Groningen, The Netherlands

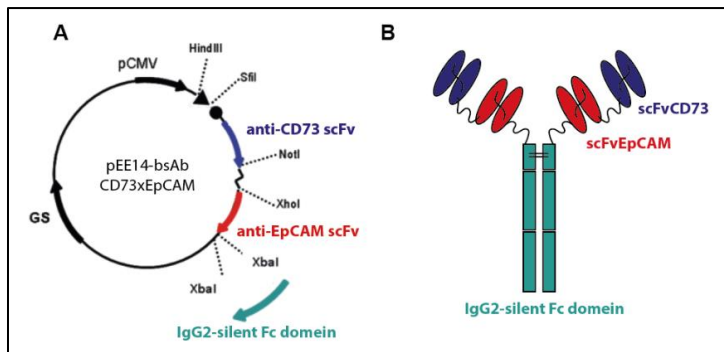

### Supplementary Figure S1: bsAb CD73xEpCAM

(A) Topology of expression plasmid pbsAb encoding bsAb CD73xEpCAM-IgG2s and (B) schematic depiction of bsAb CD73xEpCAM-IgG2s protein.

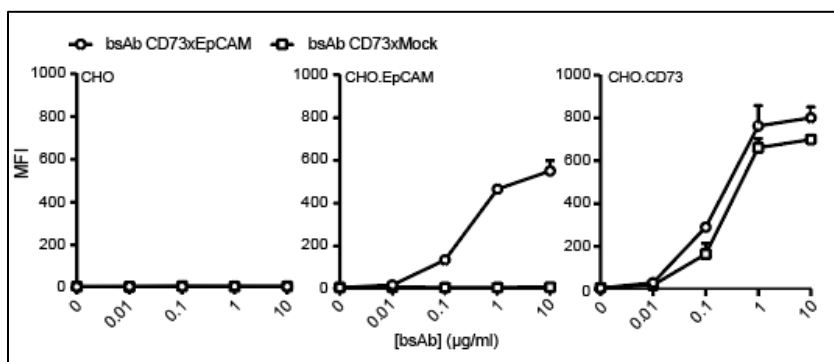

### Supplementary Figure S2: bsAb CD73xEGFR has dual binding specificity for CD73 and EGFR

Dose-dependent binding of bsAb CD73xEGFR and bsAb CD73xMock to CHO, CHO.hEGFR, and CHO.hCD73, respectively. Experiments were analyzed by flow cytometry. All graphs represent mean  $\pm$  SD.

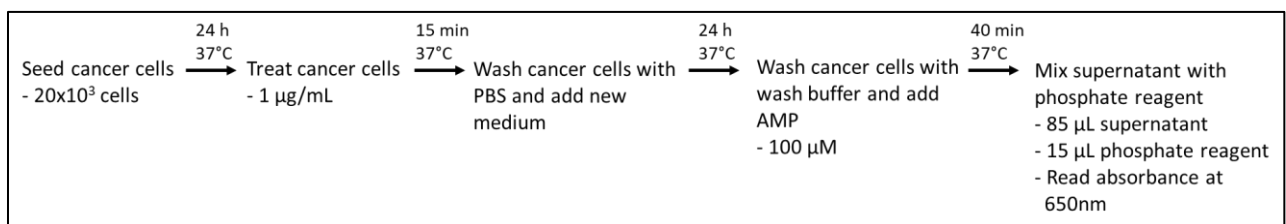

### Supplementary Figure S3: Experimental procedure CD73 enzyme assay

Cancer cells were treated with bsAb CD73xEpCAM (1 μg/mL) (or appropriate controls) at 37°C for 15 min, washed with cold PBS, and incubated at 37°C for 24 h. Subsequently, cells were washed (20 mM HEPES, 120 mM NaCl, 5 mM KCl, 2 mM MgCl<sub>2</sub>, 10 mM Glucose, pH 7.4) to remove residual Pi-containing medium and were then incubated with AMP (100 μM) at 37°C for 40 min. The supernatant was mixed with phosphate reagent and color development was evaluated by measuring the absorbance at 650 nm using a microplate reader.

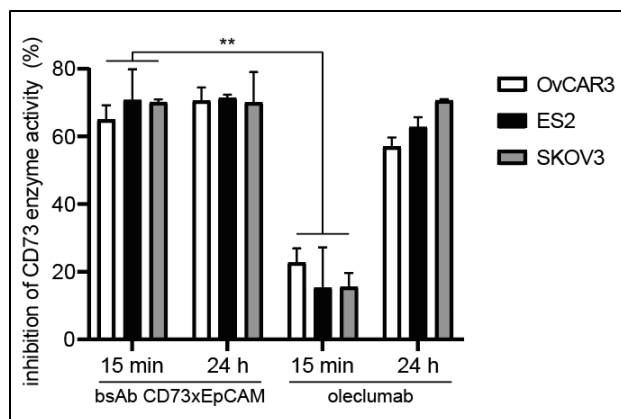

### Supplementary Figure S4: bsAb CD73xEpCAM rapidly inhibits the enzyme activity of CD73, outperforming oleclumab

Percentage inhibition of CD73 enzyme activity on a panel of  $CD73^{pos}/EpCAM^{pos}$  OC cell lines after treatment (15 min or 24 h) with bsAb CD73xEpCAM or oleclumab (both 1  $\mu\text{g/ml}$ ). Graph represent mean  $\pm$  SD. Statistical analysis (group-mean) was performed using unpaired T-test (\*\* $p < .01$ ).

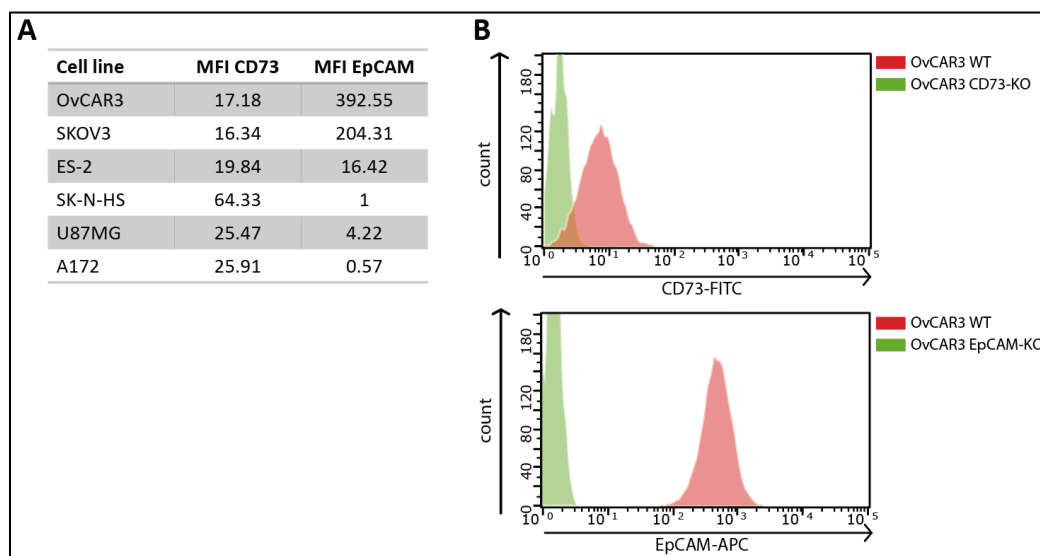

### Supplementary Figure S5: CD73 and EpCAM expression levels on 8 cell lines

(A) Mean fluorescence intensity (MFI) of CD73 and ECAM expression levels on a panel of 6 cell lines used in this study. (B) Representative histogram of CD73 and EpCAM expression levels on OvCAR3 WT vs CD73- or EpCAM-KO OC cells. Expression levels were analyzed by flow cytometry.

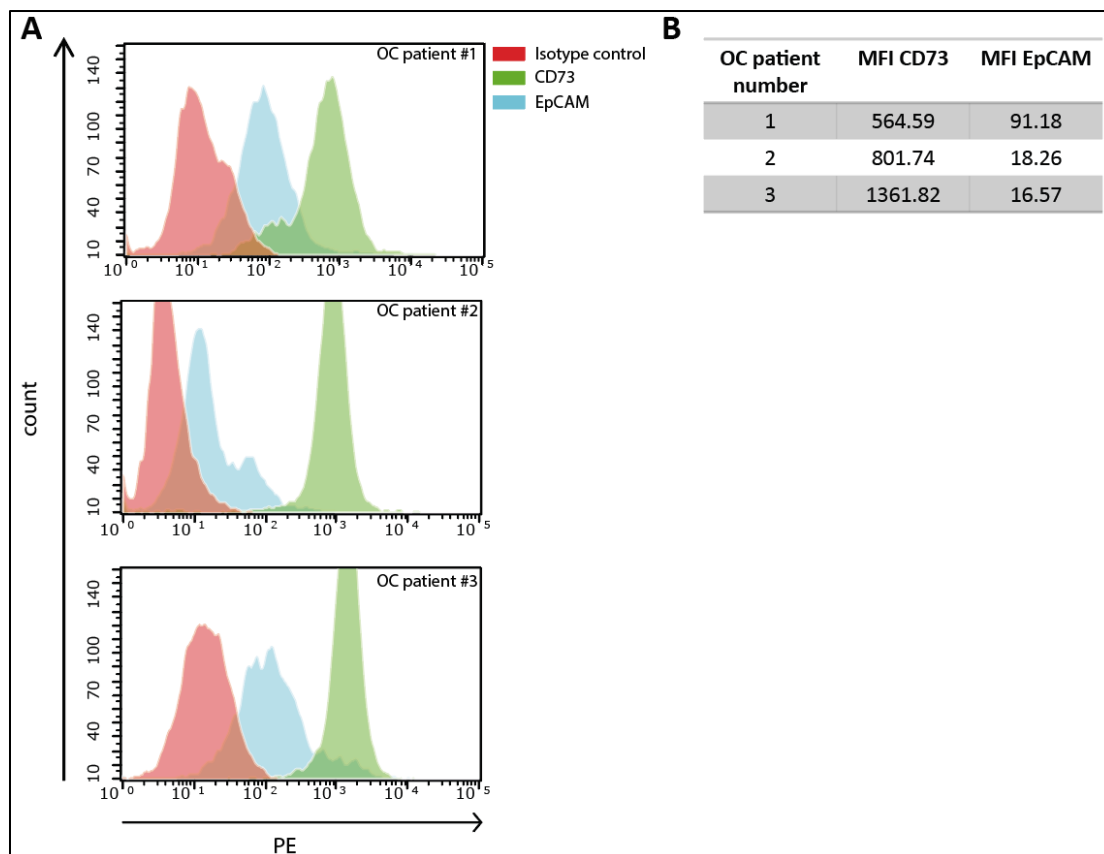

### Supplementary Figure S6: CD73 and EpCAM expression levels on patient-derived OC cells.

(A) Representative histograms of patient-derived OC cells stained with an isotype control, CD73-PE, or EpCAM-PE. Expression levels were analysed by flow cytometry. (B) Mean fluorescence intensity (MFI) of CD73 or EpCAM expression on patient-derived OC cells.

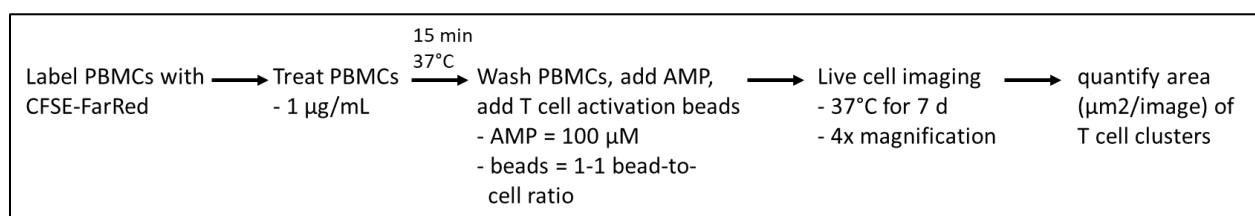

### Supplementary Figure S7: Experimental procedure T cell proliferation

Peripheral Blood Mononuclear Cells (PBMCs) obtained from healthy donors were labeled with cell permeable fluorescent dye CFSE-FarRed according to manufacturer protocol. Next, CFSE-labeled PBMCs were treated (or not) with bsAb CD73xEpCAM (1 µg/mL) (or appropriate controls) for 15 min, washed, and activated by addition of T cell activation/expansion beads in a bead-to-cell ratio of 1-1 in medium supplemented (or not) with AMP (100 µM). Live cell imaging technology (IncuCyte) was used to evaluate the size of T cell clusters by taking pictures at 4 x magnification every 6 h for 7 d. The area (µm<sup>2</sup>/image) of activated T cell clusters was quantified using IncuCyte software 2019B.

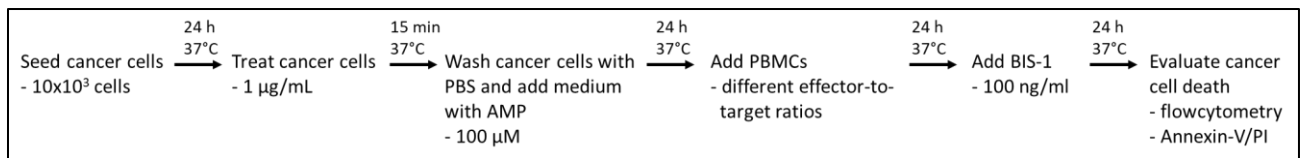

**Supplementary Figure S8: Experimental procedure cancer cell elimination by T cells** Cancer cells were treated (or not) with bsAb CD73xEpCAM ( $1\text{ }\mu\text{g/mL}$ ) (or appropriate controls) for 15 min, washed and incubated in medium supplemented (or not) with AMP ( $100\text{ }\mu\text{M}$ ) for at  $37^\circ\text{C}$  for 24 h. Next, freshly isolated PBMCs were added at different effector to target cell ratios to cancer cells, and then co-cultured at  $37^\circ\text{C}$  for 24 h. Subsequently, T cells present in the PBMC population were stimulated and re-directed to kill OvCAR3 cancer cells using EpCAM-directed/CD3-agonistic bispecific antibody BIS-1 at  $37^\circ\text{C}$  for 24 h. Apoptotic cancer cell death was assessed by flow cytometry.

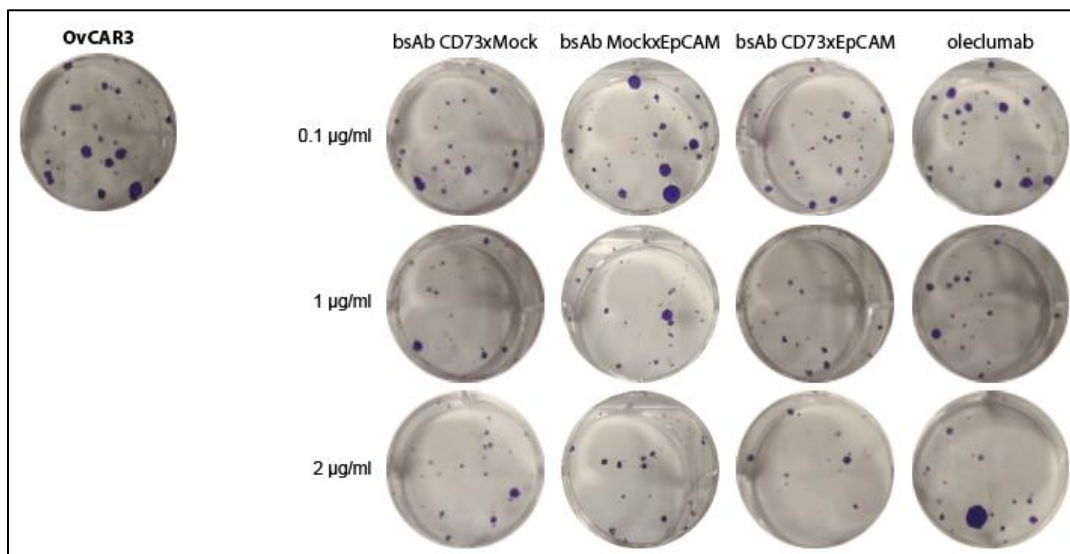

**Supplementary Figure S9: bsAb CD73xEpCAM inhibits the colony-forming activity of OvCAR3 cancer cells**

Representative pictures of OvCAR3 cell colonies after pretreatment (15 min) with bsAb CD73xEpCAM ( $0.1 - 2\text{ }\mu\text{g/mL}$ ) (or controls) and subsequent culturing at  $37^\circ\text{C}$  for 14 d. Cell colonies were stained with crystal violet.
